# Supplementary material for: Bile Acids Promote Hepatic Biotransformation and Excretion of Aflatoxin B1 in Broiler Chickens
Source: MDPI journal article supplement (doi:10.3390/toxins15120694), 2023-12-09
Supplement: s1 [file s1]

# Supplementary Materials: Bile Acids Promote Hepatic Biotransformation and Excretion of Aflatoxin B1 in Broiler Chickens

Liang Chen, Tian Wen, Aizhi Cao, Jianmin Wang, Hua Pan and Ruqian Zhao

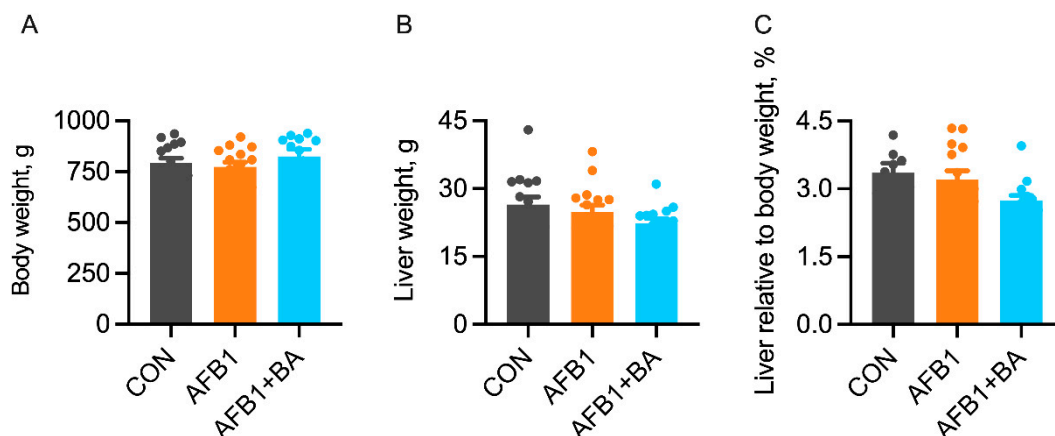

Figure S1: Effect of BA on the liver parameters in broiler chickens

A) Body weight. B) Liver weight. C) Liver relative to body weight.

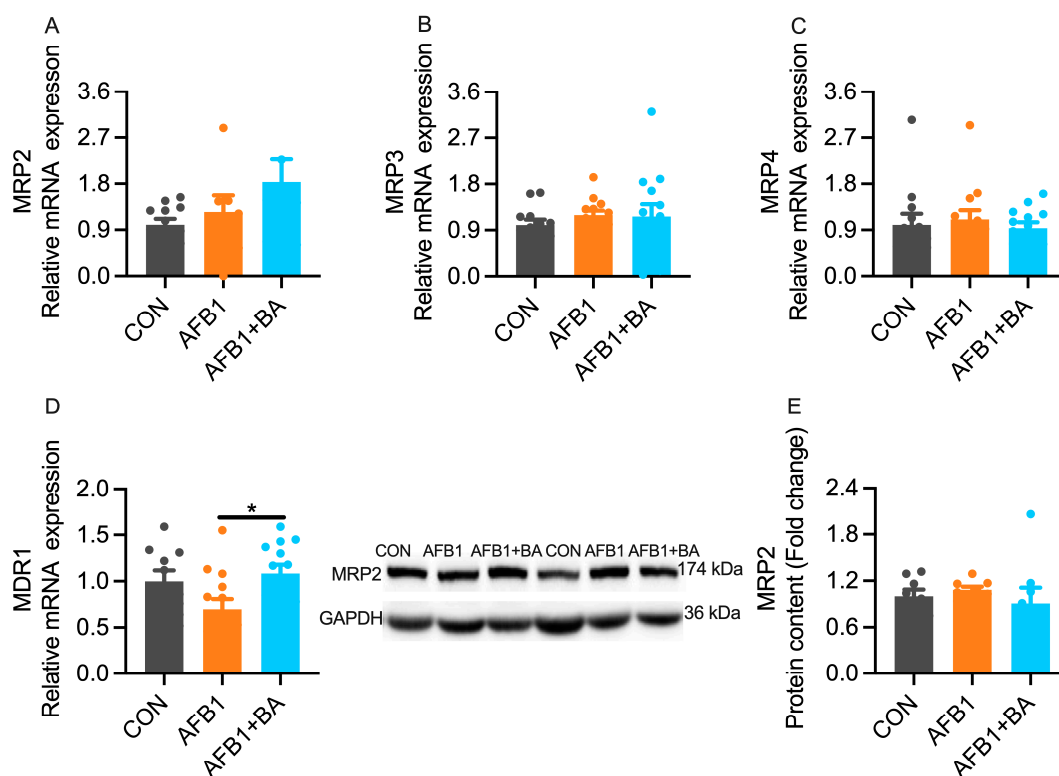

Figure S2: Effect of BA on the hepatic efflux transporters in broiler chickens

A) Hepatic mRNA expression of *MRP2*. B) Hepatic mRNA expression of *MRP3*. C) Hepatic mRNA expression of *MRP4*. D) Hepatic mRNA expression of *MRD1*.  
E) Hepatic protein expression of *MRP2*.

**Table S1: Raw data for housekeeping genes**

| Genes name | GAPDH  | ACTB   | RPLPO  | PPIA   | 18S    |
|------------|--------|--------|--------|--------|--------|
| CON group  | 18.599 | 18.650 | 19.628 | 19.195 | 15.769 |
|            | 19.230 | 16.769 | 17.415 | 18.317 | 15.843 |
|            | 19.301 | 17.337 | 18.564 | 18.587 | 17.409 |
|            | 18.168 | 17.495 | 18.909 | 18.849 | 17.630 |
|            | 18.466 | 18.270 | 20.430 | 19.757 | 18.327 |
|            | 19.372 | 15.696 | 17.959 | 17.968 | 16.189 |
|            | 19.628 | 18.585 | 18.887 | 18.734 | 16.460 |
| AFB1 group | 19.760 | 18.207 | 21.934 | 18.639 | 16.979 |
|            | 19.956 | 18.145 | 18.906 | 18.932 | 17.884 |
|            | 19.447 | 17.956 | 18.883 | 18.962 | 16.730 |
|            | 20.833 | 18.205 | 19.515 | 19.315 | 17.218 |
|            | 19.410 | 18.180 | 19.366 | 18.609 | 18.140 |
|            | 19.719 | 16.349 | 18.035 | 18.172 | 16.263 |
|            | 18.810 | 16.161 | 18.193 | 18.371 | 16.200 |

Note: GAPDH, Glyceraldehyde 3-phosphate dehydrogenase; ACTB, Actin beta; RPLPO, Ribosomal Protein Large P0; PPIA, Peptidylprolyl Isomerase A; 18S, 18S ribosomal RNA.

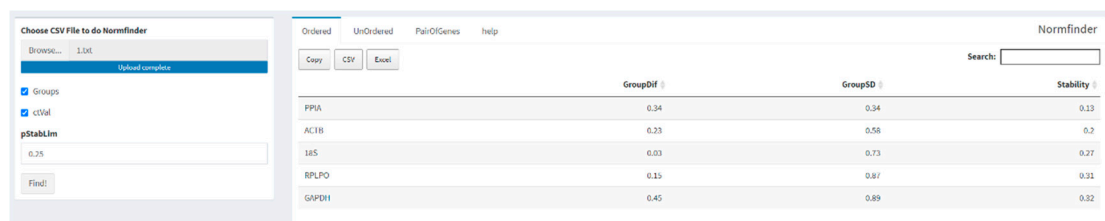

Website: [https://seqyuan.shinyapps.io/seqyuan\\_prosper/](https://seqyuan.shinyapps.io/seqyuan_prosper/)

**Figure S3: The stability analysis of housekeeping genes**
